# Supplementary figures and images for: Irs2 and Irs4 synergize in non-LepRb neurons to control energy balance and glucose homeostasis
Source: PubMed Central journal article supplement — Mol Metab. 2013 Oct 23;3(1):55–63. doi: 10.1016/j.molmet.2013.10.004 (PMC3929908; doi:10.1016/j.molmet.2013.10.004), 2013-10-23

Fig. S1, Related to Results 3.1, Irs4 targeting vector

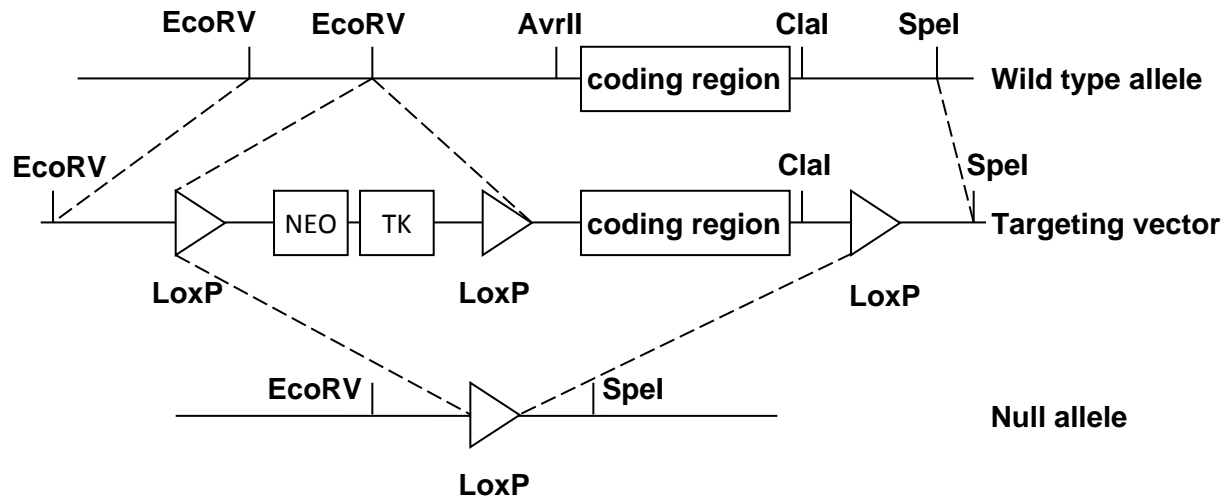

Supplement: mmc1.pdf [file mmc1.pdf]
